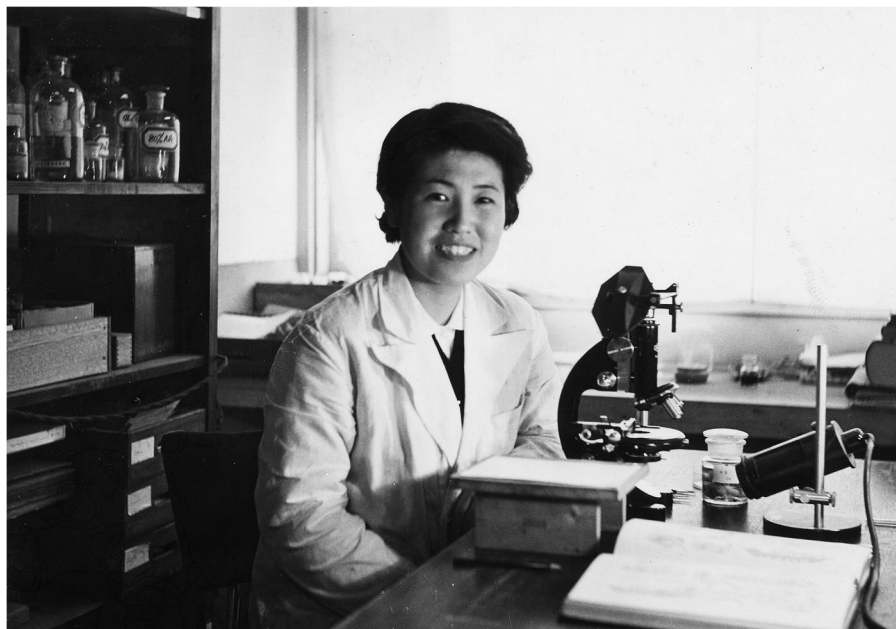

*With best wishes,  
Shigeko Ooishi*

## SHIGEKO OOISHI (1927-2014), COPEPODOLOGIST WITHOUT BORDERS

David M. Damkaer \*

P.O. Box 814, Monroe, WA 98272-0814, USA

DOI: 10.1163/1937240X-00002301

Shigeko Ooishi was Japan's first woman carcinologist, for the most part a student of the ascidicole copepods. For those unfamiliar with this interesting subset of copepods associated with ascidians, they are not so arcane as might be expected. They were recorded in our science in Redi's (1684) extensive "Observations concerning the living animals that one finds within living animals." In the centuries since, they have had considerable exposure through the specialist works of such great practitioners as George Allman, Ernest Brément, Eugène Canu, Édouard Chatton, Wilhelm Giesbrecht, Eugène Hesse, Adolf Schellenberg, and Tamerlane Thorell, names familiar to all copepodologists. Canu's (1892) monograph is a classic of copepod literature, worth looking at even if you are not a student of these copepods.

Shigeko was born in Kumamoto on 2 June 1927 (in the cyclic Year of the Rabbit). Kumamoto is a port city on the East China Sea, on Kyushu, the southernmost of Japan's three largest islands. Her father Sohkiichi Ooishi and mother Ei Ooishi were owners of a popular soba restaurant, specializing in buckwheat noodles as the foundation for colorful and exotic dishes. She had an older brother, and a younger brother and sister, all predeceasing her. Her oldest brother was killed in World War II; her younger brother inherited the family restaurant.

Shigeko attended local public schools, graduating from the municipal high school. In 1945, she entered the Nara Women's Higher Normal College. This was founded in 1908 as an imperial school for teachers; it is now the Nara Women's University. Nara Prefecture is on the western

\* E-mail: cockercrek@aol.com

border of Mie Prefecture on the Pacific coast of central Honshu, Japan's main island. Both areas were significant in Shigeko's life. After earning a bachelor's degree from Nara College in 1949, she taught high school science in Kumamoto.

In May 1951, Shigeko's world merged with crustaceans when she became an assistant to Suetoshi Shiino (1908-1978) at the Prefectural University of Mie. The university was founded in 1874, always with a strong agricultural component, including fisheries. The prefecture is famous for its oyster/pearl culturing, and Shigeko taught zoology to students in these subjects. Shigeko concurrently worked on her doctorate at the Nagoya University, founded in 1871 on the Pacific coast north of Mie in Japan's third-largest city. In 1965, she was awarded the Doctor of Science for publications on the embryology of decapods (Ooishi, 1959, 1960). Guided by Shiino's lifelong studies of the copepods parasitic on fishes, Shigeko turned toward copepods associated with invertebrates, in particular to the ascidicoles, beginning publications on these in 1961. Shiino had been a student of the copepodologists Taku Komai (1886-1972), who studied at Woods Hole, and Yo Okada (1891-1973), who studied under Maurice Caullery (1868-1958) in France. Shigeko, therefore, continued an honored academic line of carcinologists.

A distinguished carcinologist, a highly responsible researcher, and a much loved friend of his colleagues and students, Dr. Shiino has left them a much greater legacy than can be found in his 137 publications – the legacy of a devoted scientist, teacher and friend (Ooishi, 1979).

Shiino became the head of the university's new Faculty of Fisheries in 1949. By 1964, Shigeko was a lecturer at the university in Mie. She was named an Associate Professor in February 1975 and was a Professor from 1980 until her retirement in May 1991.

A second turning point in Shigeko's life came in 1965 when she met Paul Illg (1914-1998), a Professor from the University of Washington visiting Japan (Hadfield, 1998). Illg (1958), an established researcher of ascidicoles, invited her to Seattle and Friday Harbor.

I thank you for all you did for me during the two years I served as a Research Associate at the University of Washington. It was my greatest pleasure that I could work on the Taxonomy and Life History of Haplostomina with you and learn the modern taxonomy from you. I am particularly grateful and do appreciate it very much indeed. . . . Looking forward eagerly to meeting you and your family again and extending my deepest thanks for the wonderful time which I had at your charming home, the Laboratories, the University and many other places (Ooishi letter to Illg, 18 September 1967).

Illg became a second professor and fatherly figure to Shigeko. Patricia Dudley (1929-2004), one of Illg's students, was also working with these copepods and they all became lifelong friends (Dudley, 1966; Damkaer, 2004). Shigeko was supported by grants from the National Science Foundation, by the University of Mie, and by her own funds. She wanted to stay but she was required by her faculty to return to Japan.

The Friday Harbor Laboratories were established in 1904, as the Puget Sound Marine Station, for the University of Washington, on the largest island of the archipelago between Washington State and Vancouver Island, British Columbia.

The area, one of remarkable biological diversity, is commonly known as northern Puget Sound. It is charmingly remote, requiring then as now an hour's ferry ride from a mainland terminal about two hours' travel time north from Seattle. The physical surroundings must have reminded Shigeko of Japan's coastal villages. For over a century, the laboratories have been an essential center for a mutually supporting and friendly family of resident and visiting teachers and researchers. Shigeko became a valued member of that community in the long tradition of the station, returning at least during the summers of 1973, 1977, 1982, 1984, and 1987; she moved to Friday Harbor permanently as an independent investigator after her retirement in 1991, interspersed with short visits to Mie and Kumamoto.

Shigeko made her visiting countrymen at home by serving traditional meals recollected from her family's restaurant. She also did this for colleagues that I occasionally brought to the laboratories. Shigeko learned to drive her own automobile here, but she seemed oblivious to the outside and was never a good driver.

Shigeko traveled widely for connections and collections, making friends wherever she went. This included California (1979, 1987), Denmark (2001), Florida (1995), France (1989, 1992, 1996), Germany (1996), Hawaii (1974, 1985, 1993, 1994), Holland (1972), Ireland (1995), Italy (1989), Mexico (1975, 1983, 1991), New Zealand (1996, 2001), Norway (1992), Okinawa (1985, 1986), Palau (1974), and Vancouver Island (1991, 1993). She gave presentations at the second through the seventh meetings of the World Association of Copepodologists, in Canada (1984), England, Japan, United States, Germany, and Brazil (1999). An army of international admirers and collaborators included Donald Abbott, Jose Bresciani, Fenner Chace, Marit Christiansen, Oliver Coleman, Daniele Defaye, Vivian Gotto, Josephine Hart, Dora Henry, Gayle Heron, Ju-Shey Ho, Lipke Holthuis, Arthur Humes, Eugene Kozloff, George and Nettie MacGinitie, Claude Monniot, Sigeru Motoda, Makoto Omori, Janet Reid, Jan Stock, and Takasi Tokioka.

In 1975, Shigeko was asked by Taisoo Park to look at marine plankton cyclopoids in his collections at Texas A&M University.

I am not going to become a planktonologist like Taisoo (Ooishi letter to Illg, 22 April 1975).

Shigeko hoped to work during some weekends with Illg, but the project and the distances were too demanding. Even though she enjoyed looking at new kinds of copepods, she only stayed in Texas for 6 months, returning to Japan by way of the Gulf of California and Seattle.

Shigeko was a charter member of The Crustacean Society and a member of the Biological Society of Washington, the Carcinological Society of Japan, the Japanese Society of Systematic Zoology, and the Zoological Society of Japan.

The Friday Harbor Laboratories have long had close ties with Japan through exchange of scholars. This was formalized in 2012 with the Morse Foundation, named for the American Edward Sylvester Morse (1838-1925), the University of Tokyo's first Professor of Zoology (Gorbman, 1964). Shigeko's role was acknowledged in 2013 when she was named an honorary fellow of the foundation.

Shigeko's marine copepods are so regularly associated with solitary and compound ascidians (sessile tunicates) that they were taxonomically assigned to a family Ascidicolidae, now seen to be from several families: Archinotodelphyidae, Ascidicolidae, Botryllophillidae, Buproridae, Enterocolidae, Enteropsidae, and Notodelphyidae, all gnathostome cyclopoids. Except for a few species from octocorals, all are bound to ascidians. Most species live in the host's pharynx or atrium, living as commensals stealing filtered food; some are embedded in the host's tissues and are true parasites in some stages. Their body form ranges from active cyclopidiform to restricted vermiform, "penetrating further into the host's larder than others" (Gotto, 1979). Shigeko described many of the cyclopidiform males for the first time, adding considerably to knowledge of particular genera. She expanded information on the specificity of hosts and on geographic distribution, areas that still need attention.

I think I was very lucky to meet you in 1965 to work on the ascidicole copepods (Ooishi letter to Illg, 29 August 1978).

Shigeko published 52 reports on copepods between 1961 and 2014, an average of essentially one per year. The papers were descriptions of new genera and species (22), redescrptions of established species (20), fauna of specific localities (5), essays on development and morphology (4), and Shiino's biography (1). Their geographical coverage is reflected in the places she visited (above) or in collections she received from others (Madagascar and the Philippines). She described 45 new species and the genus *Loboixys* Ooishi, 2006.

Characteristic of Shigeko's descriptions were her large and clear illustrations, rarely if ever exceeded in technical and artistic perfection. It is a daunting task to indicate copepod mouthparts in relation to each other, but such depictions were regular features of her work. The drawings required a mighty energy and except for her last few papers, when she ran out of time, her illustrations were simply breathtaking. Usually photographs are not useful in copepod descriptions, but Shigeko's were well crafted and added insight to particular features. This was especially so with electron microscope photos and color photos of living specimens (Ooishi, 1972, 1999, 2002a, 2004b, 2007b).

Ooishi and Illg (1977) was a significant contribution, describing 13 new species in 4 genera from the waters accessible from Friday Harbor in a world review of a large subfamily.

Thank you very much for the copy just received of the reprint by you and Paul Illg on the San Juan haplostomines. It is a most impressive volume and one that should serve as a major exhibit in any case against those who maintain that the fauna of the world we live in is adequately known (Fenner Chace letter to Ooishi, 23 June 1978).

A number of these were hardbound and Shigeko hand-colored several plates in a few of those, leaving a rare memento for future bibliophiles.

[Another] manuscript was first reviewed by two anonymous carcinologists. One of them does not look like a copepodologist, because he thinks me a man. Dr. Gotto later helped me with the corrected manuscript (Ooishi letter to Damkaer, 24 March 2004).

Shigeko, in her own final illness, modeled her departure on her admired professor:

In spite of his illness, from which [Dr. Shiino] never recovered, he devoted himself to completing his paper on these animals and finally finished it before he went back to the University Hospital. . . . A few months before he passed away he had expressed to his family and colleagues his desire to donate all the literature and books he had collected to the Library of Mie University. One cannot avoid the impression that he already knew his end was near at that time, and his mind was filled with friendship in giving opportunities to anyone who would follow him in the study of carcinology (Ooishi, 1979).

Shigeko's incredible timing of finishing her manuscripts, leaving Friday Harbor in May 2014, and dying of cancer in her hometown hospital on 14 September 2014 must be viewed as a final gift to her friends and family who remember her long and enviable life.

Shigeko held an intriguing combination of shyness and obstinacy; she was comfortable in the background yet she was not to be pushed around. She never wanted to talk about her early days in spite of gentle prodding. Her career track was difficult and demanded sacrifices in an intense male-dominated culture. The closest she came to an acknowledgment of that in our 40-year acquaintance was a response to a biography of Maria Dahl (1872-1972), an early woman copepodologist:

I was given an encouragement from Maria through your paper (Ooishi postcard to Damkaer, 1980).

Like her mentors Shiino and Illg, Shigeko finished her life in good order and handed down her work to the next generation, adding to the knowledge of the systematics, behavior, distribution, and impact of her intrusive little beasts. With her many reports, she will also be remembered through *Enterocola ooishiae* O'Reilly, 2008, a copepod associate of solitary ascidians in Scotland.

Claudia Mills and Chad Walter provided inspiration and details for this notice. The portrait, from ca. 1970, is through the courtesy of Keiji Baba and the Ooishi family. The signature is from 1984. It is fitting to repeat here a frequent acknowledgment of Shigeko's Friday Harbor colleagues Eugene Kozloff and Craig Staude for exceptional assistance and patience with editing, correspondence, and computers; her papers could not have been completed without their devoted help.

## REFERENCES

- Canu, E. 1892. Les copépodes du Boulonnais; morphologie, embryologie, taxonomie. Travaux du Laboratoire de Zoologie Maritime de Wimereux-Ambleteuse 6: 1-292.
- Damkaer, D. M. 2004. Patricia Louise Dudley. Monoculus 48: 10.
- Dudley, P. L. 1966. Development and systematics of some Pacific marine symbiotic copepods; a study of the biology of the Notodelphyidae, associates of ascidians. University of Washington Publications in Biology 21: 1-282.
- Gorbman, A. 1964. The development of academic zoology in Japan. The Biologist 46(3-4): 49-72.
- Gotto, R. V. 1979. The association of copepods with marine invertebrates. Advances in Marine Biology 16: 1-109.
- Hadfield, M. G. 1998. Paul Louis Illg, 23 September 1914-10 May 1998. Journal of Crustacean Biology 18: 839-841.
- Illg, P. L. 1958. North American copepods of the family Notodelphyidae. Proceedings of the U.S. National Museum 107: 463-649.
- Ooishi, S. 1959. Studies on the teloblasts in the decapod embryo. I. Origin of teloblasts in *Heptacarpus rectirostris* (Stimpson). Embryologia 4: 283-309.

- . 1960. Studies on the teloblasts in the decapod embryo. II. Origin of teloblasts in *Pagurus samuelis* (Stimpson) and *Hemigrapsus sanguineus* (de Haan). *Embryologia* 5(3): 270-282.
- . 1970. Marine invertebrate fauna of the Ogasawara and Volcano Islands, pp. 75-104. In, Report on the Marine Biological Expedition to the Ogasawara (Bonin) Islands, 1968. Toba Aquarium and Asahi Shimbun Publishing Company, Tokyo.
- O'Reilly, M. G. 2008. New records of copepods associated with ascidians from Scottish waters, including the description of a new species, *Enterocola ooishiae* n. sp. (Cyclopoida, Ascidicolidae), from a simple ascidian. *Glasgow Naturalist* 25(1): 57-74.
- Redi, F. 1684. Osservazioni agli animali viventi che si trovano negli animali viventi. Piero Matini, Florence.

#### APPENDIX: COPEPODOLOGICAL CONTRIBUTIONS OF SHIGEKO OOISHI

- Ooishi, S. 1961a. A notodelphyoid copepod, *Pachypygus gibber* (Thorell), newly found in Japan. Report of the Faculty of Fisheries, Prefectural University of Mie 4(1): 81-86.
- . 1961b. A new notodelphyoid copepod, *Pachypygus curvatus* n. sp., found in Japan. Report of the Faculty of Fisheries, Prefectural University of Mie 4(1): 88-92.
- . 1962. Four species of notodelphyoid copepods newly found in Japan. Report of the Faculty of Fisheries, Prefectural University of Mie 4(2): 7-25.
- . 1963a. On some notodelphyoid copepods from the Bay of Kesennuma. Report of the Faculty of Fisheries, Prefectural University of Mie 4(3): 377-389.
- . 1963b. On two new notodelphyoid copepods from the Bay of Matoya. Report of the Faculty of Fisheries, Prefectural University of Mie 4(3): 419-428.
- . 1964. Results of Amami Expedition. No. 3. Invertebrates. Report of the Faculty of Fisheries, Prefectural University of Mie 5(1): 189-215.
- . 1972. Notodelphyid copepods associated with compound ascidians in Akkeshi Bay, Japan. Publications from the Seto Marine Biological Laboratory 19(5): 303-325.
- . 1979. Sueo M. Shiino (1908-1978). *Crustaceana* 36(2): 173-181.
- . 1980. The larval development of some copepods of the family Ascidicolidae, subfamily Haplostominae, symbionts of compound ascidians. Publications from the Seto Marine Biological Laboratory 25(5/6): 253-292.
- . 1987. A preliminary list of copepods associated with ascidians collected around Sesoko Island, Okinawa. *Galaxea* 6(1): 95-98.
- . 1988. Crustacea, pp. 51-130. In, K. Dan et al. (eds.), *Embryology of Invertebrates, Part II*. Baifukan, Tokyo. (In Japanese.)
- . 1991. North Pacific copepods (Cyclopoida: Ascidicolidae) associated mostly with compound ascidians. *Bulletin of the Plankton Society of Japan, Special Volume*: 49-68.
- . 1994a. A redescription of the ascidicolid copepod *Haplostoma canui*. *Cahiers de Biologie Marine* 35: 347-356.
- . 1994b. *Haplostomides hawaiiensis*, new species (Copepoda: Cyclopoida: Ascidicolidae), associated with the ascidian *Polyclinum constellatum* at Honolulu, Hawaii. *Hydrobiologia* 292/293: 89-96.
- . 1995. *Haplostoma humesi*, new species (Copepoda: Cyclopoida: Ascidicolidae), associated with a compound ascidian (*Aplidium* sp.) from Madagascar. *Journal of Crustacean Biology* 15: 309-316.
- . 1996. Two ascidicolid copepods, *Botryllophilus macropus* Canu and *B. norvegicus* Schellenberg, from British waters. *Journal of Crustacean Biology* 16: 169-191.
- . 1998a. Two new species of notodelphyid copepods, *Doroixys bispinosa* and *Pythodelphys illgi*, from the Gulf of California. *Journal of Crustacean Biology* 18: 369-382.
- . 1998b. *Haplostoma dudleyae* sp. nov. (Cyclopoida: Ascidicolidae), parasitic in *Eudistoma olivaceum* from the Indian River in southern Florida. *Journal of Marine Systems* 15: 273-279.
- . 1999. Female and male *Botryllophilus ruber* (Copepoda: Cyclopoida) associated with the compound ascidian *Botryllus schlosseri*. *Journal of Crustacean Biology* 19: 556-577.
- . 2000. *Botryllophilus bamfieldensis*, new species (Copepoda: Cyclopoida: Ascidicolidae), living in a compound ascidian from the west coast of Vancouver Island, Canada. *Journal of Crustacean Biology* 20: 571-588.
- . 2001. Two ascidicolous copepods, *Haplostomides otagoensis* n. sp. and *Botryllophilus* cf. *banyulensis* Brément, living in compound ascidians from Otago Harbor, New Zealand. *Hydrobiologia* 453/454: 417-426.
- . 2002a. Female and male *Haplostomides scotti* (Copepoda: Cyclopoida) living in the compound ascidian *Polyclinum aurantium*. *Journal of Crustacean Biology* 22: 249-267.
- . 2002b. Redescription of *Botryllophilus inaequipes* Hansen, 1923 (Crustacea: Copepoda: Cyclopoida: Ascidicolidae). *Proceedings of the Biological Society of Washington* 115: 636-649.
- . 2002c. Description of *Botryllophilus sarsi*, new species (Copepoda: Cyclopoida: Ascidicolidae), replacing *B. brevipes* Sars, 1921. *Journal of Crustacean Biology* 22: 819-833.
- . 2004a. Redescription of *Haplostoma banyulensis* (Copepoda: Cyclopoida: Ascidicolidae) living in the compound ascidian *Trididemnum tenerum* from Strangford Lough, Northern Ireland. *Journal of Crustacean Biology* 24: 1-8.
- . 2004b. Female and male *Haplostoma brevicauda* (Copepoda: Cyclopoida: Ascidicolidae), living in compound ascidians. *Journal of Crustacean Biology* 24(3): 422-439.
- . 2005. *Haplostomides hibernicus* (Copepoda: Cyclopoida) living in the compound ascidian *Polyclinum aurantium*. *Journal of Crustacean Biology* 25: 181-189.
- . 2006a. Two species of *Botryllophilus* (Copepoda: Cyclopoida) living in compound ascidians, and a revision of female morphotype A of the genus. *Journal of Crustacean Biology* 26: 23-47.
- . 2006b. *Loboixys ryukyuensis* (Crustacea: Copepoda: Cyclopoida: Notodelphyidae), a new genus and species, living in the compound ascidian *Diplosoma virens* at Okinawa, Japan. *Proceedings of the Biological Society of Washington* 119: 373-383.
- . 2007a. Female *Ascidicola rosea* Thorell (Copepoda: Cyclopoida) living in solitary ascidians. *Journal of Crustacean Biology* 27: 327-338.
- . 2007b. *Enterocola fulgens* van Beneden (Crustacea: Copepoda: Cyclopoida) living in the compound ascidian *Polyclinum aurantium* Milne Edwards. *Proceedings of the Biological Society of Washington* 120: 293-310.
- . 2008a. *Haplostomides gotttoi*, new species (Crustacea: Copepoda: Cyclopoida: Ascidicolidae), living in a compound ascidian from Madagascar. *Proceedings of the Biological Society of Washington* 121: 85-93.
- . 2008b. Female *Enteropsis roscoffensis* Chatton & Brément (Crustacea: Copepoda: Cyclopoida: Ascidicolidae), living in the solitary ascidian *Dendrodoa grossularia*. *Proceedings of the Biological Society of Washington* 121: 501-511.
- . 2008c. Female and male *Mychophilus roseus* Hesse (Crustacea: Copepoda: Cyclopoida: Ascidicolidae) living in the compound ascidian *Botryllus schlosseri*. *Proceedings of the Biological Society of Washington* 121: 512-530.

- . 2009a. *Enteropsis fusiformis*, new species (Copepoda: Cyclopoida: Ascidicolidae), living in a compound ascidian from Madagascar. *Proceedings of the Biological Society of Washington* 122: 333-341.
- . 2009b. Four new species of *Haplostoma* (Copepoda: Cyclopoida: Ascidicolidae) living in compound ascidians from Madagascar. *Proceedings of the Biological Society of Washington* 122: 426-448.
- . 2010a. *Enterocola hessei* Chatton & Harant (Copepoda: Cyclopoida: Ascidicolidae) living in the compound ascidian *Clavelina lepadiformis* (Müller). *Proceedings of the Biological Society of Washington* 123: 137-148.
- . 2010b. *Enterocola brementi* Illg & Dudley (Copepoda: Cyclopoida: Ascidicolidae) living in the compound ascidian *Aplidium pallidum* (Verrill), compared with *E. mammiferus* Chatton & Harant living in *A. asperum* Drasche. *Proceedings of the Biological Society of Washington* 123: 312-323.
- . 2011. Female and male *Enterocola sydnii* Chatton & Harant (Copepoda: Cyclopoida: Ascidicolidae) living in compound ascidians. *Proceedings of the Biological Society of Washington* 124: 358-377.
- . 2012. Two new species of *Botryllophilus* (Copepoda: Cyclopoida: Ascidicolidae), living in compound ascidians from Madagascar. *Proceedings of the Biological Society of Washington* 125: 122-144.
- . 2014a. Three species of *Enterocola* van Beneden (Copepoda: Cyclopoida: Ascidicolidae) living in compound ascidians from Madagascar, with a revision of *Enterocola setiferus* Hansen. *Proceedings of the Biological Society of Washington* 126: 343-368.
- . 2014b. *Botryllophilus symmetricus*, new species (Copepoda: Cyclopoida: Ascidicolidae), living in a compound ascidian (*Synoicum*) from Madagascar. *Proceedings of the Biological Society of Washington* 127: 340-352.
- . 2014c. *Botryllophilus kozloffii*, new species (Copepoda: Cyclopoida: Ascidicolidae), living in the compound ascidian *Clavelina lepadiformis* (Müller) from Roscoff, France. *Proceedings of the Biological Society of Washington* 127: 483-495.
- . 2014d. *Botryllophilus millari*, new species (Copepoda: Cyclopoida: Ascidicolidae), living in the compound ascidian *Eudistoma caeruleum* (Sluiter) from Madagascar. *Proceedings of the Biological Society of Washington* 127: 496-509.
- , and P. L. Illg. 1973. A new species of notodelphyid copepod associated with *Pterygascidia longa* (Van Name, 1918) from the Basilan Strait, Philippines. *Zoologische Mededelingen* 46: 217-230.
- , and ———. 1974. *Haplostomella halocynthiae* (Fukui), an ascidicolid copepod associated with a simple ascidian, *Halocynthia roretzi* (Drasche), from Japan. *Publications from the Seto Marine Biological Laboratory* 21(5/6): 365-375.
- , and ———. 1977. Haplostominae (Copepoda, Cyclopoida) associated with the compound ascidians from the San Juan Archipelago and vicinity. *Special Publications from the Seto Marine Biological Laboratory* 5: 1-154.
- , and ———. 1986a. A notodelphyid copepod, *Lonchidiopsis hartmeyer* Vanhöffen, associated with a simple ascidian from Ago Bay. *Bulletin of the National Science Museum, Tokyo, Series A (Zoology)* 12(2): 45-59.
- , and ———. 1986b. Morphological comparison of the male mouthparts of *Haplostomides* with those of *Botryllophilus*. *Syllogeus* 58: 392-399.
- , and ———. 1988. Two morpho-types of *Botryllophilus* (Cyclopoida, Ascidicolidae). *Hydrobiologia* 167/168: 561-566.
- , and ———. 1989. *Botryllophilus abbotti* new species (Copepoda: Cyclopoida: Ascidicolidae) associated with a compound ascidian from the Monterey Peninsula. *Bulletin of Marine Science* 45: 447-466.
- , and M. G. O'Reilly. 2004. Redescription of *Haplostoma eruca* (Copepoda: Cyclopoida: Ascidicolidae) living in the intestine of *Ciona intestinalis* from the Clyde Estuary, Scotland. *Journal of Crustacean Biology* 24: 9-16.

AVAILABLE ONLINE: 12 December 2014.
